1 **KDM5A/B promotes HIV-1 latency and KDM5 inhibitors promote HIV-1 lytic reactivation**

2

3 **Authors**

4 Tai-Wei Li<sup>a</sup>, Dawei Zhou<sup>a</sup>, Zhenyu Wu<sup>a</sup>, Guillaume N. Fiches<sup>a</sup>, Xu Wang<sup>b</sup>, Youngmin Park<sup>a</sup>, Wei  
5 Jiang<sup>c</sup>, Wen-Zhe Ho<sup>b</sup>, Andrew D. Badley<sup>d</sup>, Netty G. Santoso<sup>a</sup>, Jun Qi<sup>e</sup>, and Jian Zhu<sup>a,f,\*</sup>

6

7 **Affiliations**

8 <sup>a</sup>Department of Pathology, The Ohio State University Wexner Medical Center, Columbus, OH  
9 43210, USA

10 <sup>b</sup>Department of Pathology and Laboratory Medicine, Temple University Lewis Katz School of  
11 Medicine, Philadelphia, PA 19140, USA.

12 <sup>c</sup>Department of Microbiology and Immunology, Medical University of South Carolina,  
13 Charleston, Charleston, SC 29425, USA

14 <sup>d</sup>Division of Infectious Diseases, Mayo Clinic, Rochester, MN 55902, USA

15 <sup>e</sup>Dana-Farber Cancer Institute, Boston, MA 02215, USA

16 <sup>f</sup>Department of Microbial Infection and Immunity, The Ohio State University Wexner Medical  
17 Center, Columbus, OH 43210, USA

18

19 \*To whom correspondence should be addressed: Jian Zhu (Jian.Zhu@osumc.edu).

20

21

22

23 **Key words:** HIV-1; KDM5; latency; lytic reactivation; reservoir; eradication; demethylation;  
24 JQKD82; AZD5582; CD4<sup>+</sup> T cells; monocytes; microglia

25

26

27

28 **Abstract**

29       Combinational antiretroviral therapy (cART) effectively suppresses HIV-1 infection,  
30 replication, and pathogenesis in HIV-1 patients. However, the patient's HIV-1 reservoir still cannot  
31 be eliminated by current cART or other therapies. One putative HIV-1 eradication strategy is  
32 “shock and kill”, which reactivates HIV-1 in latently-infected cells and induces their cytopathic  
33 effect or immune clearance to decrease the patients’ reservoir size. KDM5A and KDM5B act as  
34 the HIV-1 latency-promoting genes, decreasing the HIV-1 viral gene transcription and reactivation  
35 in infected cells. Depletion of KDM5 A/B by siRNA knockdown (KD) increases H3K4  
36 trimethylation (H3K4me3) in HIV-1 Tat-mediated transactivation. We also found that the KDM5-  
37 specific inhibitor JQKD82 can increase H3K4me3 at the HIV-1 LTR region during HIV-1  
38 reactivation and induce cytopathic effects. We applied the JQKD82 in combination with the non-  
39 canonical NF- $\kappa$ B activator AZD5582, which synergistically induced HIV-1 reactivation and cell  
40 apoptosis in HIV-1 infected cells. These results suggested that the KDM5 inhibition can be a  
41 putative HIV-1 latency-reversing strategy for the HIV-1 “shock and kill” eradication therapy.

42

43

44

45

46

47

48

## 49 **Introduction**

50 Globally, over 36 million individuals are infected with human immunodeficiency virus type 1  
51 (HIV-1), and currently, no approved medicine or therapy can eradicate latent HIV-1 proviruses in  
52 infected patients. HIV infection dramatically affects patients' immune systems and causes  
53 acquired immunodeficiency syndrome (AIDS). Although combination antiretroviral therapy  
54 (cART) can suppress viral load below the detection limit in patients' blood and halt disease  
55 progression, HIV-1 can still reactivate from latently infected cells in lymphoid tissue that maintain  
56 persistent infection in cART-treated patients. The promising shock-and-kill strategy of HIV-1  
57 eradication therapy involves combining latency-reversing agents (LRAs) and cART to reactivate  
58 the latent HIV-1 in the infected reservoir cells without inducing global T cell activation. During  
59 HIV-1 reactivation, the infected cells would be eliminated by the viral cytopathic effect and the  
60 cellular immune response from the cytolytic T lymphocytes (CTL) or natural killer (NK) cells [1-  
61 4]. Unfortunately, most of the currently used LRAs, such as the histone deacetylase (HDAC)  
62 inhibitor vorinostat, can induce viral reactivation (as the shock step) but cannot decrease the HIV-  
63 1 latent reservoir size (as the kill step) in the clinical trial setting [2, 5, 6]. The possible reasons for  
64 this include that the HIV-1 reservoir cells, such as CD4<sup>+</sup> T cells or macrophages, are resistant to  
65 the killing from CTLs [7-9] or adapt to avoid being killed by NK cells [10, 11]. Furthermore, the  
66 latently infected T cells can evade CTL/NK cells in the germinal follicles of lymphoid tissue [12-  
67 15]. For the future shock-and-kill strategy, we will need to focus on the kill strategies to facilitate  
68 the cell death of reservoir cells. Additionally, the putative strategy should activate the CTL/NK  
69 immunosurveillance or induce correct cytokine/chemokine to increase the killing of HIV-1  
70 infected cells to eliminate the reservoir in the lymphoid tissue [9, 16].

71 Our previous research involved the CRISPR-knockout screening on latently infected cell lines  
72 to investigate novel genes that control HIV-1 latency and reactivation [17]. We found that potential  
73 latency-promoting genes (LPG) mainly participate in epigenetic regulation and chromatin  
74 modification/organization. Notably, the knockdown of certain histone demethylases targeting  
75 H3K4 or H3K36 methylation can induce HIV-1 reactivation. Also, the pan-Jumonji histone  
76 demethylase inhibitor JIB-04 [18-20] could induce HIV-1 reactivation in the infected T cells or  
77 monocytes. These results suggested that H3K4 or H3K36 methylation can be critical to HIV-1  
78 reactivation and viral gene expressions. We also found that MINA53, which acts as the H3K36  
79 demethylase, can promote HIV-1 latency due to decreased H3K36 trimethylation and inhibit  
80 transcription elongation during HIV-1 reactivation [21]. This research focused on other LPG  
81 candidates, H3K4 demethylases regulating HIV-1 latency/activation. H3K4 trimethylation  
82 (H3K4me3) is located mainly at the transcription start site (TSS) to associate with TAF3 in the  
83 TFIID complex [22-25] to facilitate transcription initiation. Previous studies showed that the HIV-  
84 1 long terminal repeat (LTR) promoter enriched H3K4me3 during HIV-1 Tat-mediated  
85 transactivation for viral gene transcription [26-28]. However, the detailed regulatory mechanism  
86 of H3K4me3 in HIV-1 LTR for viral gene expression remains unclear. We previously identified  
87 one H3K4me3 demethylase, lysine demethylase 5A (KDM5A), as a putative HIV-1 LPG that may  
88 decrease the H3K4me3 level of HIV-1 LTR to suppress HIV-1 reactivation. We hypothesize that  
89 if we can deplete KDM5A function through gene knockdown or pharmacology inhibition in HIV-  
90 1 latent infected cells, we can trigger HIV-1 reactivation in infected cells, which can be killed by  
91 the induced cytopathic effect or the CTL/NK cell immunosurveillance in the patient's tissue.

92 KDM5A is one of the KDM5 demethylases (KDM5 A, B, C, and D), which catalyzes  
93 demethylation from H3K4me3 to H3K4me2 and then to the final product H3K4me1 [29-32].

94 Previously reported showed that KDM5A can induce PD-L1 expression [33, 34] that may suppress  
95 the immune response for immune escape during HIV-1 infection [35-39]. The other KDM5,  
96 KDM5B, has been identified to suppress immune sensing from the STING-GAS signaling [40]  
97 and RIG-I signaling [41] to decrease innate immunity and antiviral responses. Furthermore,  
98 KDM5B can prevent macrophages from releasing inflammatory cytokines like IL12 or TNF- $\alpha$   
99 during *L. donovani* infection [42]. We hypothesize that KDM5A or KDM5B depletion in HIV-1  
100 latently infected cells induces HIV-1 reactivation and stimulates innate immunity to antiviral  
101 responses. Furthermore, the H3K4m3 level of proapoptotic genes is usually low to prevent  
102 accidental cell death during the native state [23], and thus, KDM5A depletion can promote cell  
103 apoptosis [43, 44]. Therefore, we expect that inhibition of KDM5A or KDM5B can increase the  
104 antiviral responses and proapoptotic genes with HIV-1 reactivation in latently infected cells to  
105 eliminate the reservoir by HIV-1 induced cytopathic effects or antiviral-mediated programmed cell  
106 death. Above all, this study focuses on the putative KDM5 depletion treatment to achieve the  
107 shock-and-kill strategy for future putative HIV-1 eradication therapy.

108

## 109 **Results**

### 110 **Knockdown of KDM5A increases the HIV-1 Tat/LTR-driven transcription.**

111 To identify whether KDM5A depletion increases HIV-1 LTR transcription, we performed  
112 KDM5A knockdown (KD) by siRNA in TZM-bl cells, which contain the HIV-1 LTR-driven  
113 luciferase reporter [45-47]. First, we used immunoblotting (IB) to identify decreased KDM5A  
114 expression with two specific siRNAs for knockdown (**Fig 1A**). Both KDM5A siRNAs decreased  
115 KDM5A expression in transfected TZM-bl while increasing the H3K4me3 level and IRF3

116 phosphorylation. Previous studies also suggested that depletion of the KDM5 family (specifically,  
117 KDM5B) can increase the IRF3 phosphorylation and transactivation to induce Type I interferon  
118 and ISG expression for antiviral responses [40, 41, 48], which can promote cell apoptosis of HIV-  
119 1 infected cells [49-52]. Also, the phosphorylated IRF3 can associate caspase-8 with Bax,  
120 promoting the proapoptotic state for cell death [53]. We used the luciferase reporter assay to  
121 identify whether the KDM5A KD affects HIV-1 LTR-driven transcription with or without HIV-1  
122 Tat mediation (**Fig 1B**). We found that KD of siKDM5A#1 increases HIV-1 LTR transcription in  
123 the native state of TZM-bl cells. Furthermore, the KD from two different siKDM5A increased  
124 HIV-1 Tat-mediated LTR transcription in transfected TZM-bl cells. We also found that KDM5B  
125 KD increases the H3K4me3 level, phosphorylation of IRF3 (**Fig 1C**), and HIV-1 Tat-mediated  
126 LTR transcription (**Fig 1D**), consistent with the results of KDM5A KD in transfected TZM-bl  
127 cells. These results suggested that decreasing the KDM5 family, such as KDM5A or KDM5B, can  
128 increase HIV-1 reactivation and induce the IRF3-mediated proapoptotic state.

129 **KDM5 inhibitor JQKD82 increases HIV-1 reactivation and cell death in latently infected**  
130 **cells.**

131 Since we showed that KDM5A and KDM5B KD both can promote HIV-1 LTR/Tat-mediated  
132 transcription in TZM-bl cells, we went further to investigate whether the inhibition of all KDM5  
133 family members (such as KDM5 A, B, C, and D) [30] can promote HIV-1 reactivation in latently  
134 infected cells. We used the KDM5 inhibitor JQKD82 [44] to treat the CA5 cell line, the T  
135 lymphocyte cell line integrated with the full-length HIV-1 proviral genome and the HIV-1 LTR-  
136 driven GFP reporter [54, 55]. JQKD82 is the prodrug of KDM5-C49 [56] with the ester  
137 metabolized group to inhibit KDM5 demethylase activity with high cellular permeability. We  
138 treated the CA5 cells with a low concentration (10 or 25  $\mu$ M) for 5 days to change the landscape

139 of histone methylation and epigenetic regulation for HIV-1 reactivation. The JQKD82-treated CA5  
140 cells showed a significant increase in the GFP expression from HIV-1 reactivation compared to  
141 the DMSO solvent control group (**Fig 2A-B**). These results showed that inhibiting KDM5  
142 demethylase activity can directly induce HIV-1 reactivation in latently infected cells. To identify  
143 whether KDM5 inhibitor JQKD82 can increase the cell death of HIV-1 infected cells, we treated  
144 CA5 cells with JQKD82 for 5 days and stained them with LIVE/DEAD far-red dye to quantify the  
145 cell death from the drug effect or HIV-1-induced cytopathic effect [57]. CA5 cells treated with 25  
146  $\mu\text{M}$  JQKD82 had higher rates of cell death than untreated CA5 cells or Jurkat parental cells with  
147 the same treatment (**Fig 2C**). The results suggested that the inhibition of KDM5 can decrease cell  
148 survival and increase cytopathic effects in HIV-1 latently infected cells.

149 We used the chromatin immunoprecipitation (ChIP) qPCR assay to identify whether  
150 JQKD82 can increase the H3K4me3 level in the HIV-1 LTR to increase HIV-1 gene transcription  
151 for reactivation [26]. We treated CA5 cells for 5 days with DMSO or 25  $\mu\text{M}$  JQKD82 and then  
152 harvested HIV-1 LTR-associated nucleosomes from cell lysates by the pull-down of anti-KDM5A  
153 or anti-H3K4me3 antibodies. We extracted the nucleosome-associated DNA and performed qPCR  
154 with the specific primers targeting the nucleosome binding sites in HIV-1 LTR (Nuc-0 and Nuc-  
155 1) [17, 58, 59]. The results showed that JQKD82 increases the H3K4me3 level in Nuc-0 and Nuc-  
156 1 (**Fig 2D**) at the HIV-1 LTR in CA5 cells compared to the untreated control group. The increase  
157 of H3K4me3 in HIV-1 LTR, especially at the Nuc-1 site where the TSS of HIV-1 viral genes [23,  
158 24], can promote the transcription initiation to increase HIV-1 viral gene expressions and  
159 reactivation in the latently infected cells.

160 Also, we treated CA5 cells with a high dose of JQKD82 (50 or 100  $\mu\text{M}$ ) in a short period (48h),  
161 which also promoted a significant increase in HIV-1 reactivation (**Fig S1 A-B**). The high dose of

162 JQKD82 induced significantly higher cell death of CA5 than untreated CA5 cells and Jurkat  
163 parental cells under the same treatment (**Fig S1C**). These results suggested that a high dose of  
164 JQKD82 treatment can induce HIV-1 reactivation and cell death of latently infected cells in a short  
165 period.

### 166 **JQKD82 in combination with AZD5582, increases HIV-1 reactivation and cell death in** 167 **latently infected cells**

168 Previous studies indicated that the non-canonical NF- $\kappa$ B activator AZD5582 (AZD) increases  
169 HIV-1 reactivation in ex vivo patient samples, humanized mouse models, and SIV-infected  
170 macaque models [60]. However, AZD5582 could not decrease the HIV-1 reservoir size in SIV-  
171 infected macaques. We hypothesized that combining JQKD82 and AZD5582 boosts HIV-1  
172 reaction and induces cell death for the shock-and-kill strategy for HIV-1 eradication therapy. We  
173 treated CA5 cells with JQKD82 for 3 days and then refreshed the treatment with or without 0.2  
174  $\mu$ M AZD5582 for 2 days. Treated cells were harvested, and LIVE/DEAD staining was performed;  
175 using FASC, the cells were then analyzed for HIV-1 reactivation from GFP expression and cell  
176 death from APC dye signals (**Fig 3A**). AZD5582 induced ~20% GFP expression from the treated  
177 CA5 cells, and JQKD82 further strengthened the AZD5582-mediated HIV-1 reactivation in the  
178 treated CA5 cells (**Fig 3B**). Furthermore, JQKD82 significantly increased the cell death of  
179 AZD5582-reactivated CA5 cells compared to the Jurkat cells with the same combination treatment  
180 (**Fig 3C**). We used an IB assay to identify the protein markers for cell responses from the  
181 JQKD82/AZD5582-treated Jurkat and CA5 cells (**Fig 3D**). We found that JQKD82 increases the  
182 total H3K4me3 level in both Jurkat and CA5 cells, and JQKD82 can directly increase the HIV-1  
183 p55/p24 expression in the treated CA5 cells. With the JQKD82/AZD5582 combination treatment,  
184 JQKD82 increased the HIV-1 p55/p24 expression and the PARP cleavage (as the apoptosis marker



185 [61, 62]) in the AZD5582-reactivated CA5 cells. We also applied a high dose of JQKD82  
186 cotreatment with AZD5582 to Jurkat and CA5 cells for 48 hours (**Fig S2A**). The  
187 JQKD82/AZD5582 cotreatment increased the HIV-1 reactivation significantly more than a single  
188 JQKD82 or AZD5582 treatment (**Fig S2B**). The JQKD82/AZD5582 cotreatment also induced  
189 higher cell death in CA5 cells than single-drug treated CA5 cells and the JQKD82/AZD cotreat-  
190 Jurkat cells (**Fig S2C**). However, the JQKD82/AZD5582 cotreatment also caused high  
191 cytotoxicity in Jurkat parental cells (~20% cell death).

192 We treated CA5 cells with another prodrug of KDM5-C49, KDM5-C70 [56], cotreated with  
193 AZD5582 for 48h. The results suggested that the high concentration of KDM5-C70 can induce  
194 HIV-1 reactivation in CA5 cells (**Fig S3A-B**). Also, KDM5-C70 synergistically increased  
195 AZD5582-induced HIV-1 reactivation in CA5 cells. However, KDM5-C70 did not significantly  
196 increase the cell-killing effect in CA5 cells with or without AZD5582 treatment (**Fig S3C**)  
197 compared to JQKD82, which has better cell permeability than KDM5-C70 [44].

198 We performed the DHIV-1 infected primary Tcm model with JQKD82/AZD5582 combination  
199 treatment. We identified that the JQK82 and JQKD82/AZD5582 treatment could increase the  
200 cellular HIV-1 Gag mRNA level in the primary HIV-1 infected Tcm cells compared to the DMSO  
201 control group (**Fig 4A**). We also treated the s peripheral blood mononuclear cells (PBMCs with  
202 CD8<sup>+</sup> T cell depletion) from HIV-1 aviremic patients with the JQKD82/AZD5582 combination  
203 treatment and harvested the cultured supernatant to detect HIV-1 viral RNA release. The results  
204 showed that the JQKD82/AZD5582 combination treatment increased HIV-1 viral RNA release  
205 from infected PBMCs in 4 donors (**Fig 4B**), suggesting that JQKD82/AZD5582 can induce HIV-  
206 1 reactivation in HIV-1 aviremic patient' PBMCs. In conclusion, JQKD82 can strengthen  
207 AZD5582-mediated HIV-1 reactivation and cell killing in HIV-1 latent infected cells. A low dose

208 of JQKD82, combined with AZD5582, can be a gradual HIV-1 eradication therapy for decreasing  
209 the latently infected cell population and HIV-1 reservoir.

210 **Inhibition of KDM5 A/B increases HIV-1 LTR/Tat-mediated transcription in other types of**  
211 **cells.**

212 We identified that the inhibition of KDM5 increases HIV-1 reactivation in latently infected  
213 CD4<sup>+</sup> T cells, and we investigated whether the KDM5s regulate the HIV-1 reactivation in the  
214 monocyte/macrophage reservoirs. We used HC69 microglia cells containing HIV-1 LTR/Tat-  
215 driven GFP reporter, mimicking the cell behavior of the HIV-1 latency reservoir in the central  
216 nerve system (CNS) [63-65]. We treated HC69 cells with a KDM5 inhibitor, JQKD82, for 5 days  
217 and found that JQKD82 significantly increased HIV-1 LTR/Tat-driven GFP expression (**Fig 5A-**  
218 **B**), but JQKD82 did not significantly increase the cell death of HC69 cells (**Fig 5C**). We also used  
219 siRNA KD of KDM5A or KDM5B to identify whether H3K4me3 demethylase promotes HIV-1  
220 latency in infected microglia. The KD of KDM5A or KDM5B significantly increased HIV-1  
221 LTR/Tat-driven GFP in transfected HC69 cells (**Fig 5 D-E**) but did not cause significant cell death  
222 in microglia cells (**Fig 5F**). These results suggested that inhibition of KDM5A or KDM5B can  
223 increase HIV-1 reactivation in the monocyte/macrophage reservoir and need to be combined with  
224 other reagents or interventions to eradicate HIV-1 infected microglia cells in CNS.

225 We also gave JQKD82/AZD5582 combination treatment to U1/HIV cells, the monocytic cell  
226 line latently infected by HIV-1 [66-68], for 5 days (**Fig S4A**). The results showed that  
227 JQKD82/AZD5582 combination treatment significantly increases HIV-1 Gag protein expression  
228 (**Fig S4B**) and mRNA level (**Fig S4C**). These results suggested that JQKD82/AZD5582  
229 combination treatment induces HIV-1 reactivation in latently infected monocytes.

230

## 231 Discussion

232 The results of this study suggested that the depletion of KDM5A or KDM5B can raise HIV-1  
233 Tat/LTR mediated transcription to promote HIV-1 reactivation (**Fig 1**). We hypothesized that  
234 KDM5s (Specially KDM5A) can recognize the H3K4me3 at HIV-1 LTR and catalyze the H3K4  
235 demethylation to increase the threshold for reactivation and promote latency in HIV-1 infected  
236 cells. After KDM5 depletion increases in the H3K4me3 level at HIV-1 LTR sites, H3K4me3  
237 facilitates the transcription initiation and HIV-1 Tat/TAR-mediated reactivation. We also found  
238 that the KD of KDM5A/B is insufficient to turn on HIV-1 LTR transcription in TZM-bl cells  
239 directly. However, KDM5-inhibitor treatment may increase other viral protein expressions, such  
240 as HIV-1 Tat, as positive feedback to facilitate the HIV-1 reactivation in the HIV-1 latent CA5  
241 cells (**Fig 2**). In conclusion, the axis of KDM5/H3K4me3/Tat interaction to regulate the  
242 transactivation of HIV-1 LTR promoter can be critical for the epigenetic controls of HIV-1  
243 reactivation and latency in latently infected cells.

244 In previous studies about the epigenetic control of HIV-1 reactivation, HDAC inhibitors such  
245 as valproic acid [69, 70], panobinostat, or SAHA (Vorinostat) [71-73] were used, which could  
246 induce HIV-1 reactivation in the latently infected cell line, primary infected cell model, or even in  
247 ex vivo aviremic ART-treated patients' infected cells. However, these HDAC inhibitors could not  
248 pass human clinical as they were being insufficient to progressively reactivate HIV-1 latent  
249 infected cells in the lymphoid tissue over a long period [5, 74], failing to terminate HIV-1 infection  
250 in resting T cells during HIV-1 reservoir expansion [75, 76], or limiting the cell killing effect [6,  
251 77-80] to decrease the reservoir in the patient's body [81]. The future shock-and-kill therapy would  
252 need to pursue or combine the different putative drugs to enhance reactivation and promote the  
253 killing of HIV-1 reservoirs. Previous studies suggested that KDM5A and KDM5B can associate

254 with HDAC-complex to perform epigenetic silencing cooperatively [82-85]. KDM5 inhibitors  
255 combined with HDAC inhibitors could benefit future HIV-1 eradication by improving the  
256 reactivation and cell-killing effects. Also, the depletion of KDM5B can potentially increase  
257 antiviral immunity and promote IRF3 signaling (**Fig 1C**), which can increase the IRF3-mediated  
258 or antiviral-induced cell death [53, 86-88] to decrease the HIV-1 reservoir expansion and archive  
259 the shock-and-kill therapeutic process.

260 JQKD82 is the prodrug with the ester-modified group of the functional metabolite KDM5-  
261 C49, which can block the  $\alpha$ -ketoglutarate catalytic site in the KDM5 Jumonji-C domain [44, 56].  
262 In a previous study, JQKD82 showed better cell permeability and cellular accumulation than other  
263 C49-derivatives or prodrugs and significantly increased the global H3K4me3 level in treated cells.  
264 In RNA-Seq analysis, the gene expressions after JQKD82-treatment increased in Type I interferon  
265 and inflammatory responses [44]. Like other KDM5 inhibitors and depletions, JQKD82 can cause  
266 the shut-down cell cycle and promote the proapoptotic state and innate immunity responses [43,  
267 44, 89, 90]. We applied the low doses of JQKD82 treatment (below 25  $\mu$ M) for an extended period  
268 (at least 5 days) to HIV-1 latent cells and induced HIV-1 reactivation and their cell death (**Fig 2**).  
269 We also applied the high doses of JQKD82 treatment (beyond 50  $\mu$ M) to latently infected cells  
270 and uninfected parental cells for a short time (48h). This treatment induced HIV-1 reactivation but  
271 also caused high cell-killing effects in uninfected parental cells (**Fig S1C**). These results suggested  
272 that intense JQKD82 can cause high cytotoxicity in uninfected cells.

273 In this study, we used the KDM5 inhibitor, JQKD82, in combination with the non-canonical  
274 NF- $\kappa$ B activator, AZD5582, to synergistically increase HIV-1 reactivation and cell death in  
275 latently infected cells. AZD5582 is a SMAC-mimetic analog that causes inhibitor of apoptosis  
276 proteins (IAPs) self-ubiquitination and degradation [60, 91] to increase p52-RelB nuclear

277 translocation and turn on downstream gene expressions [92]. AZD5582 and other SMAC-mimetic  
278 IAP inhibitors can also increase the cellular proapoptotic state for induced HIV-1 cytopathic killing  
279 [93-96]. AZD5582 could reactivate HIV-1/SIV in patient cell samples and animal models [60].  
280 However, AZD5582 alone could not decrease the reservoir size in SIV-infected macaques and  
281 increase antiviral immunity responses. Our results showed that the combination of JQKD82 and  
282 AZD5582 treatment boosted the HIV-1 reactivation and induced apoptosis (**Fig 3**) in the latently  
283 infected cells and did not cause severe cytotoxicity in the uninfected parental cells. We also found  
284 that another KDM5-C49 prodrug, KDM5-C70, can synergetically increase AZD5582-induced  
285 HIV-1 reactivation, but KDM5-C70 cannot increase the cell-killing effect as JQKD82 treatment  
286 (**Fig S3**). These results suggested that JQKD82 has a better cell permeability and KDM5-inhibitory  
287 effect [44], promoting a higher proapoptotic state in HIV-1 latently infected CD4<sup>+</sup> T cells and  
288 monocytes. We also performed JQKD82/AZD5582 combination treatment to the HIV-1 patient's  
289 PBMCs (with the depletion of CD8<sup>+</sup> T cells) and found that JQKD82/AZD5582 can induce HIV-  
290 1 reactivation and increase the release of HIV-1 viral RNA from 4 donors' infected PBMC (**Fig**  
291 **4B**). In the future, we will test more PBMC samples from different HIV-1 patients to confirm these  
292 preclinical results. Also, we will quantify the change in reservoir sizes of JQKD82/AZD5582-  
293 treated HIV-1 infected PBMCs by the quantitative viral outgrowth assay (QVOA) to validate  
294 whether the JQKD82/AZD5582 combination treatment can be the candidate for shock-and-kill  
295 therapy.

296 HIV-1 infected microglia cells are the latency reservoir and cause the abnormal inflammatory  
297 state for the pathogenesis of HIV-1-associated neurocognitive disorder (HAND), even under the  
298 cART control [97]. In order to understand the HIV-1 reactivation mechanism of microglia and  
299 develop a therapy targeting HIV-1 reservoirs in the CNS, we used the immortalizing human

300 primary microglia with HIV-1 LTR/Tat-mediated GFP reporter, HC69 cell line [63-65] to  
301 investigate whether the KDM5 depletion can increase HIV-1 reactivation and cytopathic effect.  
302 The JQKD82 treatment and KDM5 A/B siRNA KD can increase the HIV-1 LTR/Tat  
303 transactivation in HC69 microglia (**Fig 3.5**). However, the depletion of KDM5, whether by  
304 pharmaceutical inhibitors or siRNA knockdown, can not increase the cytopathic effect or cell death  
305 in HC69 microglia. HC69 cells contain the HIV-1 LTR/Tat driven GFP reporter, but HC69 cells  
306 have the deletion of HIV-1 Gag, Pol, and other accessory viral proteins, which cause single-round  
307 infection without generating severe cytopathic effects during HIV-1 reactivation. These results  
308 suggested that the KDM5 inhibitors can be a putative LRA for the HIV-1 reactivation in infected  
309 microglia, but we need to identify their cell-killing effects in the different HIV-1 infected microglia  
310 models.

311 In this study, we demonstrated that the depletion of KDM5 A/B by siRNA KD or enzymatic  
312 inhibitor JQKD82 increases the H3K4me3 at the HIV-1 LTR site and HIV-1 Tat-mediated viral  
313 gene transcriptions for HIV-1 reactivation. The KDM5 depletion combination with non-canonical  
314 NF- $\kappa$ B activator AZD5582 can significantly increase cell death in HIV-1 infected cells. The  
315 JQKD82/AZD5582 combination treatment can promote the HIV-1 reactivation and proapoptotic  
316 state to eliminate the HIV-1 reservoir for putative HIV-1 cure therapy.

317

## 318 **Material and methods**

### 319 **Cell culture**

320 TZM-bl, Jurkat, and U1 cell lines were obtained from the National Institutes of Health (NIH)  
321 AIDS reagent program. The Jurkat-derived CA5 cell line latently infected with replication-

322 competent, full-length HIV-1 genome was provided by Dr. O. Kutsch [54, 55]. TZM-bl and  
323 HEK293T (Cat. # CRL-3216, ATCC) cells were cultured in Dulbecco's modified Eagle's medium  
324 (DMEM, Cat # D5796, Sigma). All T cell lines were cultured in Roswell Park Memorial Institute  
325 (RPMI) 1640 medium (Cat # 11875093, Gibco). Completed cell culture medium contained 10%  
326 fetal bovine serum (FBS, Cat. # 10437028, Thermo Fisher), penicillin (100 U/ml) /streptomycin  
327 (100 µg/ml) (Cat. # MT30002CI, Corning). Primary peripheral blood mononuclear cells (PBMCs)  
328 were maintained and cultured with a completed RPMI medium with 1× minimum essential  
329 medium nonessential amino acid (Cat #11140-050, Gibco), 1× sodium pyruvate (Cat #11360-070,  
330 Gibco), and 20 mM HEPES (Cat #15630-080, Gibco). Human recombinant IL-2 (rIL-2, Roche) at  
331 30 U/ml was supplied to primary cells every 2 days [57]. HC69 and the parental C20 microglia  
332 cells were cultured in BrainPhys medium (Cat. #05790, StemCell Technologies) containing N2  
333 supplement (Cat. #17502048, Gibco), penicillin (100 U/ml) /streptomycin, 100 µg/mL normocin  
334 (Cat. #ant-nr-1, InvivoGen), 25 mM glutamine (Cat. #25030081, Gibco), 1% FBS and 1 µM  
335 DEXA (Cat. #D4902, Sigma) freshly added to the cell culture [63-65].

### 336 **Compounds, antibodies, and plasmid**

337 Recombinant human TNF- $\alpha$  (Cat. # 554618) was purchased from BD. Biosciences. KDM5  
338 inhibitor JQKD82 was synthesized and generously gifted by Dr. Jun Qi's lab [44]. AZD-5582 (Cat.  
339 # CT-A5582) was purchased from Chemie Tek. KDM5-C70 (M60192-10S) was purchased from  
340 Xcess Biosciences.

341 Mouse anti-GAPDH antibody (Cat. # sc-32233) was purchased from Santa Cruz  
342 Biotechnology. Rabbit anti-phosphorylated IRF3 antibody (Cat. # 4947S), rabbit anti-IRF3  
343 antibody (Cat. # 4302S), rabbit anti-H3 antibody (Cat. # 9715S), rabbit anti-PARP antibody (Cat.

344 # 9542T), goat HRP-conjugated anti-mouse IgG antibody (Cat. # 7076S), and goat HRP-  
345 conjugated anti-rabbit IgG antibody (Cat. # 7074) were purchased from Cell Signaling Technology.  
346 Mouse anti-KDM5A antibody (Cat # 91211) and Mouse anti-H3K4me3 antibody (Cat #61379)  
347 were purchased from Active Motif. HIV-1 Gag p24 IgG1 monoclonal antibody was produced from  
348 the hybridoma cell line (NIH AIDS reagent program).

349 The pQC-HIV-1 Tat was constructed by subcloning C terminal Flag tag fused HIV-1 Tat into  
350 the pQCXIP retroviral empty vector (Clontech) using NotI and BamHI sites [98].

### 351 **Transient transfection**

352 For KDM5A knockdown, 10 nM siRNA (siKDM5A; #1: siRNA ID: s11835: 5'-  
353 CCGCUAAAGUGGAAGCUAUtt-3'; #2: siRNA ID: s11836: 5'-GCGAGUUUGUUGUGACA-  
354 UUtt-3'; siKDM5B #1: siRNA ID: s21145: 5'-GGCAGUAAAGGAAAUCGAAtt ; #2: siRNA Id:  
355 s21146: 5'-GGAAGAUCUUGGACUUAUUtt-3', Ambion by Life technologies; non-targeting  
356 control: Silencer™ Negative Control No. 4 siRNA, si N.T., Cat. # AM4641, Invitrogen) was  
357 reversely transfected in TZM-BL cells using Lipofectamine™ RNAiMAX Transfection Reagent  
358 (Cat. # 13778030, Invitrogen). Cells were kept in culture for 48h and continued the further  
359 experiment subjected to IB of KDM5A or KDM5B to evaluate the knockdown efficacy.

360 For HIV-1 Tat overexpression to induce the HIV-1 LTR-driven reporter assay, we performed  
361 the transient transfection of pQC-HIV-1 Tat or pQCXIP empty vector control in TZM-BL cells  
362 using Fugene6 transfection reagents (Cat. # E2691, Promega). Briefly, cells were seeded and  
363 incubated with the mixture of plasmids with Fugene 6 for 24 h, following the manufacturer's  
364 protocol. The medium was changed and further cultured for an additional 24h for harvesting and  
365 performed following experiments.



## 366 **Luciferase reporter assays**

367 Treated TZM-BL cells were trypsinized and harvested for luciferase activity assay (One-Glo  
368 System, Cat. # E6110, Promega) following the manufacturer's protocol. Chemiluminescence was  
369 determined by using the was detected using Biotek Cytation5 and analyzed by GEN5 software  
370 (Biotek). In the HIV-1 LTR-driven reporter assay, the relative light unit (RLU) of luciferase  
371 luminescence was divided by the total protein input (RLU/ $\mu$ g) quantified by the BCA assay kit  
372 (Cat. #23225, Thermo Scientific). The readouts were normalized with the siNT/pQC-empty  
373 vector-transfected TZM-BL group.

## 374 **Protein immunoblotting**

375 Protein immunoblotting was performed following our previously published protocols [57, 99].  
376 Briefly, cells were harvested, washed by PBS, and pelleted. Cell pellets were lysed in RIPA buffer  
377 (Cat. #20-188, Millipore) containing protease inhibitor cocktail (Cat. # A32965, Thermo Scientific)  
378 on ice, followed by brief sonication to prepare cell lysate. The BCA assay kit (Cat. #23225, Thermo  
379 Scientific) was used to quantify the total protein amount in cell lysate, which was boiled in the  
380 SDS loading buffer with 5%  $\beta$ -mercaptoethanol (Cat. #60-24-2, Acros Organics). The denatured  
381 protein samples were separated by Novex™ WedgeWell™ 4-20% SDS-PAGE Tris-Glycine gel  
382 and transferred to PVDF membrane (iBlot™ 2 Transfer Stacks, Invitrogen) using iBlot 2 Dry  
383 Blotting System (Cat. # IB21001, Thermo Scientific). The membranes were blocked by 5% milk  
384 in PBST and probed by the specific primary antibodies at 4°C overnight, followed by the HRP-  
385 conjugated secondary antibodies. The membranes were developed using the Clarity Max ECL  
386 substrate (Cat. # 1705062, Bio-Rad).

## 387 **Cell viability assay**

388 The death of HIV-1-reactivated or compound-treated cells was determined using the  
389 LIVE/DEAD Fixable Far Red Dead Cell Stain Kit (Cat. # L10120, Invitrogen), following the  
390 manufacturer's protocol [57]. In brief, the treated cells were washed and incubated with the  
391 working dilution of LIVE/DEAD dye for 30 mins and then washed with PBS. Stained cells were  
392 fixed with 4 % paraformaldehyde (Cat. # 15714S, Electron Microscopy Sciences), and analyzed  
393 the APC signaling by the BD Accuri C6 Plus flow cytometer (BD Biosciences).

#### 394 **Flow cytometry**

395 Cells were harvested, washed twice with PBS, fixed by 4% paraformaldehyde, and then  
396 resuspended in 2% BSA with PBS for FASC analysis. The cell samples were analyzed using an  
397 Accuri C6 Plus flow cytometer (BD Biosciences) with forward versus side scatter (FSC-A versus  
398 SSC-A) gating and the corresponding optical filters for the excitation/emission of fluorescence  
399 expression. The percentage of fluorescence-positive cells was determined by using the FlowJo  
400 V10 software.

#### 401 **Chromatin immunoprecipitation (CHIP) assay**

402 ChIP assay was conducted as described previously [17, 59, 99, 100]. Cells were cross-  
403 linked by using 0.5% paraformaldehyde for 10 min, followed by treatment with 125 mM glycine  
404 to quench the reaction for 5 min. After washing with cold PBS twice, cells were lysed for 10 min  
405 on ice in CE buffer (10 mM HEPES-KOH, 60 mM KCl, 1 mM EDTA, 0.5% NP-40, 1 mM DTT,  
406 pH: 7.9 with protease inhibitor cocktail). The nuclei were pelleted by centrifugation at  $700 \times g$  for  
407 10 min at  $4^{\circ}\text{C}$  and resuspended in SDS lysis buffer (1% SDS, 10 mM EDTA, 50 mM Tris-HCl,  
408 Ph: 8.1 with protease inhibitor cocktail). Nuclear lysates were sonicated for 2 min to fragment  
409 genomic DNA and subsequently diluted with ChIP dilution buffer (0.01% SDS, 1% Triton X-100,

410 1.2 mM EDTA, 16.7 mM Tris-HCl, 150 mM NaCl, pH: 8.1 with protease inhibitor cocktail). The  
411 lysates were incubated overnight at 4°C with specific antibodies or control mouse IgG (Cat. # sc-  
412 2025, Santa Cruz). Protein A/G beads (Cat. # 88803, Pierce) were pre-blocked with 0.5 mg/ml  
413 BSA and 0.125 mg/ml herring sperm DNA (Cat. 15634-017, Invitrogen) for 1 h at room  
414 temperature and then added to the lysate-antibody mixture for another incubation at 4°C for 2 h.  
415 Beads were washed with the following buffers: low salt wash buffer (0.1% SDS, 1% Triton X-100,  
416 2 mM EDTA, 20 mM Tris-HCl, 150 mM NaCl, pH 8.1); high-salt wash buffer (0.1% SDS, 1%  
417 Triton X-100, 2 mM EDTA, 20 mM Tris-HCl, 500 mM NaCl, pH 8.1); LiCl buffer (0.25 M LiCl,  
418 1% NP-40, 1% Na-deoxycholate, 1 mM EDTA, 10 mM Tris-HCl, pH 8.1); and TE buffer (10 mM  
419 Tris-HCl, 0.1 mM EDTA, pH 8.1), and were eluted with fresh elution buffer (1% SDS, 0.1 M  
420 NaHCO<sub>3</sub>) at room temperature. The eluted samples were incubated at 65°C overnight in the  
421 presence of 0.2 M NaCl to disassociate the cross-linking of protein/bound DNA. The eluted  
422 samples were then treated with proteinase K (Cat. #EO0491, Thermo Fisher Scientific) for protein  
423 digestion at 50°C for 2h, and the DNA species were precipitated by using UltraPure™  
424 Phenol:Chloroform: Isoamyl Alcohol reagent (Cat. # 15593031, Thermo Fisher Scientific) with  
425 the manufacturer's protocol. The DNA pellets were dried out and resuspended in water, and the  
426 pull-down DNA was quantified by qPCR.

#### 427 **Quantitative reverse transcription PCR (RT-qPCR and ChIP-qPCR)**

428 RT-qPCR assays were performed following the previously published protocol [101]. Total  
429 RNAs from harvested cells were extracted using the NucleoSpin RNA extraction kit (Cat. #  
430 740955.250, MACHEREY-NAGEL), and ~1 µg RNA was reversely transcribed using the  
431 iScript™ cDNA Synthesis Kit (Cat. # 1708890, Bio-Rad). Real-time qPCR was conducted using  
432 the iTaq™ Universal SYBR® GreenSupermix (Cat. # 1727125, Bio-Rad). The PCR reaction was

433 performed on a Bio-Rad C.F.X. connect qPCR machine under the following conditions: 95 °C for  
434 10 m, 50 cycles of 95 °C for 15 s, and 60 °C for 1 m. Relative gene expression was normalized to  
435 GAPDH internal control as the  $2^{-\Delta\Delta Ct}$  method:  $2^{(\Delta Ct \text{ of targeted gene} - \Delta Ct \text{ of GAPDH})}$ . The qPCR primers  
436 were used in this study as below: HIV-1 Gag (F: CTGAAGCGCGCACGGCAA; R: 5'-CTGAAG  
437 CGCGCACGGCAA-3'),  $\beta$  actin (F: 5'-GGACCTGACTGACTACCTCAT-3'; R: 5'-  
438 GTAGCACAGCTTCTCCTTAAT-3'), KDM5A (F: 5'-CAACGGAAAGGCACTCTCTC-3'; R:  
439 5'-CAAGGCTTCTCGAGGTTTG-3'), KDM5B (F: 5'- ATTCTGTTGGCACATTGAAGACC-  
440 3'; R: 5'- AGCATACCCTGGGACTCCATAC-3').

441 ChIP-qPCR assays were performed by the elute DNA from the ChIP assay. The fold  
442 enrichment from ChIP was normalized to IgG pull-down control in the same treatment as the  $2^{-\Delta\Delta Ct}$   
443 method:  $2^{(\Delta Ct \text{ of targeted gene} - \Delta Ct \text{ of IgG pull-down})}$ . The PCR primers for the bound nucleosomes of  
444 HIV-1 LTR were: Nuc-0 (F: 5'-GAAGGGCTAATTTGGTCCCA -3'; R: 5'-GATGCAGCTCTC  
445 GGGCCATG-3'), Nuc-1 (F: 5'-AGTGTGTGCCCGTCTGT-3'; R: 5'-TTGGCGTACTCACCA  
446 GTCGC-3').

#### 447 **DHIV-1 preparation**

448 Envelope-deficient DHIV backbone plasmid was provided by Dr. Vicente Planelles [102].  
449 VSV-G pseudo-typed DHIV viruses were prepared by transfecting HEK293T cells with DHIV  
450 vector and pMD2.G-VSV-G plasmids with Turbofect reagent (Cat. #R0531, Thermo scientific)  
451 following the manuscript protocol. The supernatant containing VSV-DHIV viral particles was  
452 harvested at 48 hours after transfection. Supernatant-containing viruses were centrifuged to  
453 remove cellular debris, filtrated with 0.45- $\mu$ m membrane filters, and stored at  $-80^{\circ}\text{C}$  [57]. Viral  
454 supernatant was tittered by infecting Jurkat cells with serial dilution for 48h and performing anti-

455 HIV-1 Gag immunofluorescence staining. The percentages of HIV-1 Gag positive cells from  
456 different dilutions of supernatant were analyzed by FASC. The infectivity of the VSV-G DHIV-1  
457 supernatant ranged from  $1.7\text{-}2.9 \times 10^7$  IU/ml.

#### 458 **Establishment of HIV-1 latency in human primary CD4<sup>+</sup> T cells**

459 A primary CD4<sup>+</sup> Tcm cell model of HIV-1 latency established by Dr. Vicente Planelles'  
460 group was used as previously described with modifications [57, 102]. The frozen Human primary  
461 peripheral blood CD4<sup>+</sup> T cells (Cat. # 200-0165, Stemcell Technologies) were stimulated on a 96-  
462 well Nunc-Immuno Maxi Sorp plate precoated with soluble anti-CD3/CD28 antibodies in RPMI  
463 complete medium containing TGF- $\beta$ 1 (10 ng/ml), anti-human IL-12 (2  $\mu$ g/ml), and anti-human IL-  
464 4 (R&D Systems) (1  $\mu$ g/ml) for 3 days. After 3-day activation, the naïve cells were considered  
465 nonpolarized, differentiated into a TCM-like phenotype, and cultured in RPMI complete medium  
466 with Human rIL-2 (30 U/ml). On day 7, the Tcm-like cells were infected with VSV-G pseudo-  
467 typed DHIV (MOI: 1.0; p24 input 100 ng/ml) through spinoculation with  $1 \times 10^6$  cells/ml with 8  
468  $\mu$ g/ml polybrene (Cat. # TR-1003-G, Sigma) at 1741g at 37°C for 2 hours. Infected Tcm cells were  
469 cultured for 10-day incubation to establish HIV-1 latency. KDM5 inhibitor JQKD82 (10  $\mu$ M) was  
470 treated for DHIV-infected T cm for 3 day and refreshed with JQKD82-treatment with or without  
471 0.1  $\mu$ M AZD-5582. We harvested these cells for RNA extraction and RT-qPCR analysis for  
472 detecting HIV-1 Gag mRNA level ( $\beta$  actin mRNA as the internal control).

#### 473 **Ex vivo analysis using CD8-depleted PBMCs of aviremic patients**

474 Consented HIV-1 positive, cART-treated, aviremic patients (<20 copies per mL) were  
475 recruited through the AIDS clinic at the Mayo Clinic to donate whole blood via leukapheresis.  
476 Peripheral blood mononuclear cells (PBMCs) were then isolated and cultured in a complete

477 medium supplemented with 30 U/mL interleukin-2 (IL2) and in the presence of 600 nM of  
478 Nevirapine (Cat. #, Sigma) for 3 days. PBMCs were subjected to CD8<sup>+</sup>T cells depletion by  
479 negative selection using the CD8 MicroBeads (Cat. # 130-045-201, Miltenyi Biotec). CD8<sup>+</sup> T  
480 cells-depleted PBMCs were treated with or without 10 μM JQKD82 for 3 days, and then the  
481 JQKD82-untreated were refreshed in the cultured medium with no-treatment (mock), 0.1 μM  
482 AZD5582 (AZD), or PMA (100 ng/ml) +ionomycin (0.5 μg/ml) or anti-CD3/CD28 Dynabeads  
483 (ratio: 1 bead to 2 cells; Cat. # 11161D, Gibco). The JQKD82-treated cells were changed medium  
484 with 10 μM JQKD82 with or without 0.1 μM AZD5582. Supernatants were collected and  
485 subjected to the extraction of HIV viral RNAs by using the QIAmp® Viral RNA Kit (Cat. #52904,  
486 Qiagen). The ultrasensitive nested qPCR assay was performed to quantify HIV viral RNA copies  
487 as previously described [100, 103, 104]. HIV-1 IIIB RNAs were extracted by the NucleoSpin RNA  
488 Virus kit (Cat. #740956.10, MACHEREY-NAGEL) and quantified with copy numbers by the  
489 Lenti-X qRT-PCR titration kit (Cat. #631235, Takara Bio). A serial dilution of HIV-1 IIIB viruses  
490 with known concentrations at a series of dilutions were used to create a standard curve for the  
491 absolute quantification of reactivated HIV-1 viruses in supernatants.

## 492 **Statistics**

493 Statistical analysis was performed using GraphPad PRISM. Data are presented as mean ±  
494 standard error of the mean (SEM) of biological repeats from at least 3 independent experiments. \*  
495 p<0.05, \*\* p<0.01, \*\*\* p<0.001, or \*\*\*\* p<0.001 indicated the significant difference analyzed by  
496 ANOVA and Tukey's multiple comparison test.

497

498

499 **Acknowledgments**

500 We thank the cooperation of and contribution of the lab of Dr. Jun Qi from Dana–Farber  
501 Cancer Institute. We thank Dr. Andrew D. Badley from Mayo Clinic for providing the HIV-1  
502 patients’ donated PBMC. We thank Dr. Olaf Kutsch from University of Alabama at Birmingham  
503 providing the CA5 cell line. We also thank Dr. Karin Musier-Forsyth, Dr. Shan-Lu Liu, and Dr.  
504 Namal Liyanage at The Ohio State University for their advice on our studies. This study was  
505 funded by NIH research grants R01AI150448, R01DE025447, R56AI157872, and R33AI116180  
506 to JZ; R03DE029716, R01CA260690 to NS.

507 **Reference**

- 508 1. Ruelas, D.S. and W.C. Greene, *An integrated overview of HIV-1 latency*. Cell, 2013.  
509 **155**(3): p. 519-29.
- 510 2. Archin, N.M., et al., *Administration of vorinostat disrupts HIV-1 latency in patients on*  
511 *antiretroviral therapy*. Nature, 2012. **487**(7408): p. 482-5.
- 512 3. Kim, J.T., et al., *Latency reversal plus natural killer cells diminish HIV reservoir in vivo*.  
513 Nat Commun, 2022. **13**(1): p. 121.
- 514 4. Garrido, C., et al., *Interleukin-15-Stimulated Natural Killer Cells Clear HIV-1-Infected*  
515 *Cells following Latency Reversal Ex Vivo*. J Virol, 2018. **92**(12).
- 516 5. Siliciano, J.D., et al., *Stability of the latent reservoir for HIV-1 in patients receiving*  
517 *valproic acid*. J Infect Dis, 2007. **195**(6): p. 833-6.
- 518 6. Shan, L., et al., *Stimulation of HIV-1-specific cytolytic T lymphocytes facilitates*  
519 *elimination of latent viral reservoir after virus reactivation*. Immunity, 2012. **36**(3): p.  
520 491-501.
- 521 7. Huang, S.H., et al., *Latent HIV reservoirs exhibit inherent resistance to elimination by*  
522 *CD8+ T cells*. J Clin Invest, 2018. **128**(2): p. 876-889.
- 523 8. Clayton, K.L., et al., *Resistance of HIV-infected macrophages to CD8(+) T lymphocyte-*  
524 *mediated killing drives activation of the immune system*. Nat Immunol, 2018. **19**(5): p.  
525 475-486.
- 526 9. Ren, Y., et al., *BCL-2 antagonism sensitizes cytotoxic T cell-resistant HIV reservoirs to*  
527 *elimination ex vivo*. J Clin Invest, 2020. **130**(5): p. 2542-2559.
- 528 10. Alter, G., et al., *HIV-1 adaptation to NK-cell-mediated immune pressure*. Nature, 2011.  
529 **476**(7358): p. 96-100.
- 530 11. Elemans, M., et al., *HIV-1 adaptation to NK cell-mediated immune pressure*. PLoS  
531 Pathog, 2017. **13**(6): p. e1006361.
- 532 12. Rahman, S.A., et al., *Lymph node CXCR5+ NK cells associate with control of chronic*  
533 *SHIV infection*. JCI Insight, 2022. **7**(8).
- 534 13. Luteijn, R., et al., *Early viral replication in lymph nodes provides HIV with a means by*  
535 *which to escape NK-cell-mediated control*. Eur J Immunol, 2011. **41**(9): p. 2729-40.
- 536 14. Fukazawa, Y., et al., *B cell follicle sanctuary permits persistent productive simian*  
537 *immunodeficiency virus infection in elite controllers*. Nat Med, 2015. **21**(2): p. 132-9.
- 538 15. Huot, N., et al., *Natural killer cells migrate into and control simian immunodeficiency*  
539 *virus replication in lymph node follicles in African green monkeys*. Nat Med, 2017.  
540 **23**(11): p. 1277-1286.
- 541 16. Macedo, A.B., et al., *The HIV Latency Reversal Agent HODHBt Enhances NK Cell*  
542 *Effector and Memory-Like Functions by Increasing Interleukin-15-Mediated STAT*  
543 *Activation*. J Virol, 2022: p. e0037222.
- 544 17. Huang, H., et al., *A CRISPR/Cas9 screen identifies the histone demethylase MINA53 as a*  
545 *novel HIV-1 latency-promoting gene (LPG)*. Nucleic Acids Res, 2019. **47**(14): p. 7333-  
546 7347.
- 547 18. Mar, B.G., et al., *SETD2 alterations impair DNA damage recognition and lead to*  
548 *resistance to chemotherapy in leukemia*. Blood, 2017. **130**(24): p. 2631-2641.
- 549 19. Horton, J.R., et al., *Characterization of a Linked Jumonji Domain of the KDM5/JARID1*  
550 *Family of Histone H3 Lysine 4 Demethylases*. J Biol Chem, 2016. **291**(6): p. 2631-46.



- 551 20. Xu, W., et al., *KDM5B demethylates H3K4 to recruit XRCC1 and promote*  
552 *chemoresistance*. Int J Biol Sci, 2018. **14**(9): p. 1122-1132.
- 553 21. Yoh, S.M., J.S. Lucas, and K.A. Jones, *The Iws1:Spt6:CTD complex controls*  
554 *cotranscriptional mRNA biosynthesis and HYPB/Setd2-mediated histone H3K36*  
555 *methylation*. Genes Dev, 2008. **22**(24): p. 3422-34.
- 556 22. Vermeulen, M., et al., *Selective anchoring of TFIID to nucleosomes by trimethylation of*  
557 *histone H3 lysine 4*. Cell, 2007. **131**(1): p. 58-69.
- 558 23. Lauberth, S.M., et al., *H3K4me3 interactions with TAF3 regulate preinitiation complex*  
559 *assembly and selective gene activation*. Cell, 2013. **152**(5): p. 1021-36.
- 560 24. Collins, B.E., et al., *Histone H3 lysine K4 methylation and its role in learning and*  
561 *memory*. Epigenetics Chromatin, 2019. **12**(1): p. 7.
- 562 25. Barski, A., et al., *High-resolution profiling of histone methylations in the human genome*.  
563 Cell, 2007. **129**(4): p. 823-37.
- 564 26. Nguyen, K., et al., *Inhibition of the H3K27 demethylase UTX enhances the epigenetic*  
565 *silencing of HIV proviruses and induces HIV-1 DNA hypermethylation but fails to*  
566 *permanently block HIV reactivation*. PLoS Pathog, 2021. **17**(10): p. e1010014.
- 567 27. Zhang, H.S., et al., *UTX-1 regulates Tat-induced HIV-1 transactivation via changing the*  
568 *methylated status of histone H3*. Int J Biochem Cell Biol, 2016. **80**: p. 51-56.
- 569 28. Liu, Y., et al., *Lysine-specific demethylase 1 cooperates with BRAF-histone deacetylase*  
570 *complex 80 to enhance HIV-1 Tat-mediated transactivation*. Virus Genes, 2018. **54**(5): p.  
571 662-671.
- 572 29. Petronikolou, N., J.E. Longbotham, and D.G. Fujimori, *Extended Recognition of the*  
573 *Histone H3 Tail by Histone Demethylase KDM5A*. Biochemistry, 2020. **59**(5): p. 647-  
574 651.
- 575 30. Plch, J., J. Hrabeta, and T. Eckschlager, *KDM5 demethylases and their role in cancer cell*  
576 *chemoresistance*. Int J Cancer, 2019. **144**(2): p. 221-231.
- 577 31. Secombe, J. and R.N. Eisenman, *The function and regulation of the JARID1 family of*  
578 *histone H3 lysine 4 demethylases: the Myc connection*. Cell Cycle, 2007. **6**(11): p. 1324-  
579 8.
- 580 32. Harmeyer, K.M., et al., *JARID1 Histone Demethylases: Emerging Targets in Cancer*.  
581 Trends Cancer, 2017. **3**(10): p. 713-725.
- 582 33. Wang, L., et al., *Enhancing KDM5A and TLR activity improves the response to immune*  
583 *checkpoint blockade*. Sci Transl Med, 2020. **12**(560).
- 584 34. Shi, L., et al., *LncRNA IFITM4P promotes immune escape by up-regulating PD-L1 via*  
585 *dual mechanism in oral carcinogenesis*. Mol Ther, 2022. **30**(4): p. 1564-1577.
- 586 35. Sperk, M., R.V. Domselaar, and U. Neogi, *Immune Checkpoints as the Immune System*  
587 *Regulators and Potential Biomarkers in HIV-1 Infection*. Int J Mol Sci, 2018. **19**(7).
- 588 36. Barber, D.L., et al., *Restoring function in exhausted CD8 T cells during chronic viral*  
589 *infection*. Nature, 2006. **439**(7077): p. 682-7.
- 590 37. Day, C.L., et al., *PD-1 expression on HIV-specific T cells is associated with T-cell*  
591 *exhaustion and disease progression*. Nature, 2006. **443**(7109): p. 350-4.
- 592 38. Banga, R., et al., *Lymph node migratory dendritic cells modulate HIV-1 transcription*  
593 *through PD-1 engagement*. PLoS Pathog, 2019. **15**(7): p. e1007918.
- 594 39. Munoz, O., et al., *Active PD-L1 incorporation within HIV virions functionally impairs T*  
595 *follicular helper cells*. PLoS Pathog, 2022. **18**(7): p. e1010673.

- 596 40. Wu, L., et al., *KDM5 histone demethylases repress immune response via suppression of*  
597 *STING*. PLoS Biol, 2018. **16**(8): p. e2006134.
- 598 41. Zhang, S.M., et al., *KDM5B promotes immune evasion by recruiting SETDB1 to silence*  
599 *retroelements*. Nature, 2021. **598**(7882): p. 682-687.
- 600 42. Parmar, N., P. Chandrakar, and S. Kar, *Leishmania donovani Subverts Host Immune*  
601 *Response by Epigenetic Reprogramming of Macrophage M(Lipopolysaccharides + IFN-*  
602 *gamma)/M(IL-10) Polarization*. J Immunol, 2020. **204**(10): p. 2762-2778.
- 603 43. Peng, D., et al., *Histone demethylase KDM5A promotes tumorigenesis of osteosarcoma*  
604 *tumor*. Cell Death Discov, 2021. **7**(1): p. 9.
- 605 44. Ohguchi, H., et al., *Lysine Demethylase 5A is Required for MYC Driven Transcription in*  
606 *Multiple Myeloma*. Blood Cancer Discov, 2021. **2**(4): p. 370-387.
- 607 45. Wei, X., et al., *Emergence of resistant human immunodeficiency virus type 1 in patients*  
608 *receiving fusion inhibitor (T-20) monotherapy*. Antimicrob Agents Chemother, 2002.  
609 **46**(6): p. 1896-905.
- 610 46. Sarzotti-Kelsoe, M., et al., *Optimization and validation of the TZM-bl assay for*  
611 *standardized assessments of neutralizing antibodies against HIV-1*. J Immunol Methods,  
612 2014. **409**: p. 131-46.
- 613 47. Luo, Z., et al., *Differential Expression of CREM/ICER Isoforms Is Associated with the*  
614 *Spontaneous Control of HIV Infection*. mBio, 2022: p. e0197921.
- 615 48. Ptaschinski, C., et al., *RSV-Induced H3K4 Demethylase KDM5B Leads to Regulation of*  
616 *Dendritic Cell-Derived Innate Cytokines and Exacerbates Pathogenesis In Vivo*. PLoS  
617 Pathog, 2015. **11**(6): p. e1004978.
- 618 49. Herbeuval, J.P., et al., *Regulation of TNF-related apoptosis-inducing ligand on primary*  
619 *CD4+ T cells by HIV-1: role of type I IFN-producing plasmacytoid dendritic cells*. Proc  
620 Natl Acad Sci U S A, 2005. **102**(39): p. 13974-9.
- 621 50. Herbeuval, J.P., et al., *CD4+ T-cell death induced by infectious and noninfectious HIV-1:*  
622 *role of type I interferon-dependent, TRAIL/DR5-mediated apoptosis*. Blood, 2005.  
623 **106**(10): p. 3524-31.
- 624 51. Dagenais-Lussier, X., et al., *USP18 is a significant driver of memory CD4 T-cell reduced*  
625 *viability caused by type I IFN signaling during primary HIV-1 infection*. PLoS Pathog,  
626 2019. **15**(10): p. e1008060.
- 627 52. Fraietta, J.A., et al., *Type I interferon upregulates Bak and contributes to T cell loss*  
628 *during human immunodeficiency virus (HIV) infection*. PLoS Pathog, 2013. **9**(10): p.  
629 e1003658.
- 630 53. Petrasek, J., et al., *STING-IRF3 pathway links endoplasmic reticulum stress with*  
631 *hepatocyte apoptosis in early alcoholic liver disease*. Proc Natl Acad Sci U S A, 2013.  
632 **110**(41): p. 16544-9.
- 633 54. Kutsch, O., et al., *Direct and quantitative single-cell analysis of human*  
634 *immunodeficiency virus type 1 reactivation from latency*. J Virol, 2002. **76**(17): p. 8776-  
635 86.
- 636 55. Duverger, A., et al., *Determinants of the establishment of human immunodeficiency virus*  
637 *type 1 latency*. J Virol, 2009. **83**(7): p. 3078-93.
- 638 56. Johansson, C., et al., *Structural analysis of human KDM5B guides histone demethylase*  
639 *inhibitor development*. Nat Chem Biol, 2016. **12**(7): p. 539-45.
- 640 57. Zhou, D., et al., *Inhibition of Polo-like kinase 1 (PLK1) facilitates the elimination of HIV-*  
641 *I viral reservoirs in CD4(+) T cells ex vivo*. Sci Adv, 2020. **6**(29): p. eaba1941.

- 642 58. Lusic, M., et al., *Regulation of HIV-1 gene expression by histone acetylation and factor*  
643 *recruitment at the LTR promoter*. EMBO J, 2003. **22**(24): p. 6550-61.
- 644 59. Power, D., et al., *IFI44 suppresses HIV-1 LTR promoter activity and facilitates its*  
645 *latency*. Virology, 2015. **481**: p. 142-50.
- 646 60. Nixon, C.C., et al., *Systemic HIV and SIV latency reversal via non-canonical NF-kappaB*  
647 *signalling in vivo*. Nature, 2020. **578**(7793): p. 160-165.
- 648 61. Kolesnitchenko, V., et al., *A major human immunodeficiency virus type 1-initiated killing*  
649 *pathway distinct from apoptosis*. J Virol, 1997. **71**(12): p. 9753-63.
- 650 62. Chaitanya, G.V., A.J. Steven, and P.P. Babu, *PARP-1 cleavage fragments: signatures of*  
651 *cell-death proteases in neurodegeneration*. Cell Commun Signal, 2010. **8**: p. 31.
- 652 63. Alvarez-Carbonell, D., et al., *Toll-like receptor 3 activation selectively reverses HIV*  
653 *latency in microglial cells*. Retrovirology, 2017. **14**(1): p. 9.
- 654 64. Alvarez-Carbonell, D., et al., *The Glucocorticoid Receptor Is a Critical Regulator of HIV*  
655 *Latency in Human Microglial Cells*. J Neuroimmune Pharmacol, 2019. **14**(1): p. 94-109.
- 656 65. Alvarez-Carbonell, D., et al., *Cross-talk between microglia and neurons regulates HIV*  
657 *latency*. PLoS Pathog, 2019. **15**(12): p. e1008249.
- 658 66. Folks, T.M., et al., *Cytokine-induced expression of HIV-1 in a chronically infected*  
659 *promonocyte cell line*. Science, 1987. **238**(4828): p. 800-2.
- 660 67. Folks, T.M., et al., *Characterization of a promonocyte clone chronically infected with*  
661 *HIV and inducible by 13-phorbol-12-myristate acetate*. J Immunol, 1988. **140**(4): p.  
662 1117-22.
- 663 68. Symons, J., et al., *HIV integration sites in latently infected cell lines: evidence of ongoing*  
664 *replication*. Retrovirology, 2017. **14**(1): p. 2.
- 665 69. Archin, N.M., et al., *Valproic acid without intensified antiviral therapy has limited*  
666 *impact on persistent HIV infection of resting CD4+ T cells*. AIDS, 2008. **22**(10): p. 1131-  
667 5.
- 668 70. Lehrman, G., et al., *Depletion of latent HIV-1 infection in vivo: a proof-of-concept study*.  
669 Lancet, 2005. **366**(9485): p. 549-55.
- 670 71. Archin, N.M., et al., *Expression of latent HIV induced by the potent HDAC inhibitor*  
671 *suberoylanilide hydroxamic acid*. AIDS Res Hum Retroviruses, 2009. **25**(2): p. 207-12.
- 672 72. Contreras, X., et al., *Suberoylanilide hydroxamic acid reactivates HIV from latently*  
673 *infected cells*. J Biol Chem, 2009. **284**(11): p. 6782-9.
- 674 73. Edelstein, L.C., et al., *Short communication: activation of latent HIV type 1 gene*  
675 *expression by suberoylanilide hydroxamic acid (SAHA), an HDAC inhibitor approved for*  
676 *use to treat cutaneous T cell lymphoma*. AIDS Res Hum Retroviruses, 2009. **25**(9): p.  
677 883-7.
- 678 74. Sagot-Lerolle, N., et al., *Prolonged valproic acid treatment does not reduce the size of*  
679 *latent HIV reservoir*. AIDS, 2008. **22**(10): p. 1125-9.
- 680 75. Archin, N.M., et al., *Antiretroviral intensification and valproic acid lack sustained effect*  
681 *on residual HIV-1 viremia or resting CD4+ cell infection*. PLoS One, 2010. **5**(2): p.  
682 e9390.
- 683 76. Archin, N.M., et al., *HIV-1 expression within resting CD4+ T cells after multiple doses*  
684 *of vorinostat*. J Infect Dis, 2014. **210**(5): p. 728-35.
- 685 77. Fidler, S., et al., *Antiretroviral therapy alone versus antiretroviral therapy with a kick*  
686 *and kill approach, on measures of the HIV reservoir in participants with recent HIV*

- 687 *infection (the RIVER trial): a phase 2, randomised trial*. Lancet, 2020. **395**(10227): p.  
688 888-898.
- 689 78. Elliott, J.H., et al., *Activation of HIV transcription with short-course vorinostat in HIV-*  
690 *infected patients on suppressive antiretroviral therapy*. PLoS Pathog, 2014. **10**(10): p.  
691 e1004473.
- 692 79. Rasmussen, T.A., et al., *Panobinostat, a histone deacetylase inhibitor, for latent-virus*  
693 *reactivation in HIV-infected patients on suppressive antiretroviral therapy: a phase 1/2,*  
694 *single group, clinical trial*. Lancet HIV, 2014. **1**(1): p. e13-21.
- 695 80. Archin, N.M., et al., *Interval dosing with the HDAC inhibitor vorinostat effectively*  
696 *reverses HIV latency*. J Clin Invest, 2017. **127**(8): p. 3126-3135.
- 697 81. Margolis, D.M., *Histone deacetylase inhibitors and HIV latency*. Curr Opin HIV AIDS,  
698 2011. **6**(1): p. 25-9.
- 699 82. Klein, B.J., et al., *The histone-H3K4-specific demethylase KDM5B binds to its substrate*  
700 *and product through distinct PHD fingers*. Cell Rep, 2014. **6**(2): p. 325-35.
- 701 83. Li, Q., et al., *Binding of the JmjC demethylase JARID1B to LSD1/NuRD suppresses*  
702 *angiogenesis and metastasis in breast cancer cells by repressing chemokine CCL14*.  
703 Cancer Res, 2011. **71**(21): p. 6899-908.
- 704 84. Nishibuchi, G., et al., *Physical and functional interactions between the histone H3K4*  
705 *demethylase KDM5A and the nucleosome remodeling and deacetylase (NuRD) complex*.  
706 J Biol Chem, 2014. **289**(42): p. 28956-70.
- 707 85. Ren, Z., et al., *A PRC2-Kdm5b axis sustains tumorigenicity of acute myeloid leukemia*.  
708 Proc Natl Acad Sci U S A, 2022. **119**(9).
- 709 86. Hasselgren, P.O., *Ubiquitination, phosphorylation, and acetylation--triple threat in*  
710 *muscle wasting*. J Cell Physiol, 2007. **213**(3): p. 679-89.
- 711 87. Zierhut, C., et al., *The Cytoplasmic DNA Sensor cGAS Promotes Mitotic Cell Death*.  
712 Cell, 2019. **178**(2): p. 302-315 e23.
- 713 88. Quillay, H., et al., *NK cells control HIV-1 infection of macrophages through soluble*  
714 *factors and cellular contacts in the human decidua*. Retrovirology, 2016. **13**(1): p. 39.
- 715 89. Yang, Y., et al., *MicroRNA let-7i Inhibits Histone Lysine Demethylase KDM5B to Halt*  
716 *Esophageal Cancer Progression*. Mol Ther Nucleic Acids, 2020. **22**: p. 846-861.
- 717 90. Wang, X., et al., *Overcoming radio-resistance in esophageal squamous cell carcinoma*  
718 *via hypermethylation of PIK3C3 promoter region mediated by KDM5B loss*. J Radiat  
719 Res, 2022. **63**(3): p. 331-341.
- 720 91. Hennessy, E.J., et al., *Discovery of a novel class of dimeric Smac mimetics as potent IAP*  
721 *antagonists resulting in a clinical candidate for the treatment of cancer (AZD5582)*. J  
722 Med Chem, 2013. **56**(24): p. 9897-919.
- 723 92. Sun, S.C., *The non-canonical NF-kappaB pathway in immunity and inflammation*. Nat  
724 Rev Immunol, 2017. **17**(9): p. 545-558.
- 725 93. Zhuang, J., et al., *Selective IAP inhibition results in sensitization of unstimulated but not*  
726 *CD40-stimulated chronic lymphocytic leukaemia cells to TRAIL-induced apoptosis*.  
727 Pharmacol Res Perspect, 2014. **2**(6): p. e00081.
- 728 94. Polanski, R., et al., *Caspase-8 activation by TRAIL monotherapy predicts responses to*  
729 *IAPi and TRAIL combination treatment in breast cancer cell lines*. Cell Death Dis, 2015.  
730 **6**: p. e1893.

- 731 95. Campbell, G.R., et al., *SMAC Mimetics Induce Autophagy-Dependent Apoptosis of HIV-*  
732 *1-Infected Resting Memory CD4+ T Cells*. *Cell Host Microbe*, 2018. **24**(5): p. 689-702  
733 e7.
- 734 96. Hattori, S.I., et al., *Combination of a Latency-Reversing Agent With a Smac Mimetic*  
735 *Minimizes Secondary HIV-1 Infection in vitro*. *Front Microbiol*, 2018. **9**: p. 2022.
- 736 97. Sreeram, S., et al., *The potential role of HIV-1 latency in promoting neuroinflammation*  
737 *and HIV-1-associated neurocognitive disorder*. *Trends Immunol*, 2022. **43**(8): p. 630-  
738 639.
- 739 98. Zhu, J., et al., *Reactivation of latent HIV-1 by inhibition of BRD4*. *Cell Rep*, 2012. **2**(4):  
740 p. 807-16.
- 741 99. Kong, W., et al., *Nucleolar protein NOP2/NSUN1 suppresses HIV-1 transcription and*  
742 *promotes viral latency by competing with Tat for TAR binding and methylation*. *PLoS*  
743 *Pathog*, 2020. **16**(3): p. e1008430.
- 744 100. Jean, M.J., et al., *Curaxin CBL0100 Blocks HIV-1 Replication and Reactivation through*  
745 *Inhibition of Viral Transcriptional Elongation*. *Front Microbiol*, 2017. **8**: p. 2007.
- 746 101. Huang, F., et al., *Inosine Monophosphate Dehydrogenase Dependence in a Subset of*  
747 *Small Cell Lung Cancers*. *Cell Metab*, 2018. **28**(3): p. 369-382 e5.
- 748 102. Bosque, A. and V. Planelles, *Induction of HIV-1 latency and reactivation in primary*  
749 *memory CD4+ T cells*. *Blood*, 2009. **113**(1): p. 58-65.
- 750 103. Mousseau, G., et al., *The Tat Inhibitor Didehydro-Cortistatin A Prevents HIV-1*  
751 *Reactivation from Latency*. *mBio*, 2015. **6**(4): p. e00465.
- 752 104. Huang, H., et al., *A Novel Bromodomain Inhibitor Reverses HIV-1 Latency through*  
753 *Specific Binding with BRD4 to Promote Tat and P-TEFb Association*. *Front Microbiol*,  
754 2017. **8**: p. 1035.

755

756

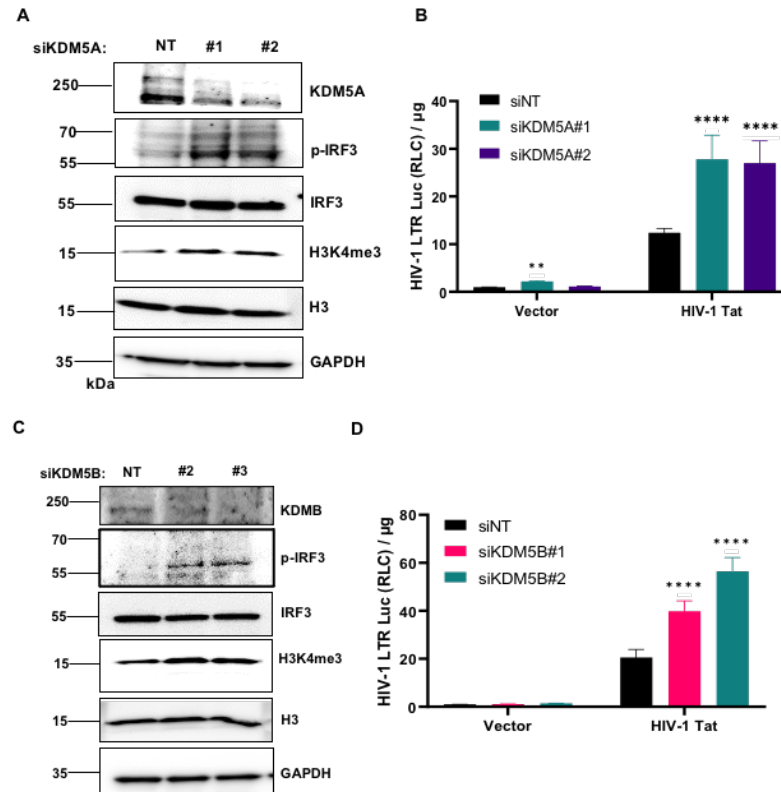

**Fig 1 siRNA Knockdown of KDM5A/B increases the HIV-1 Tat/LTR-driven transcription.** TZM-bl cells were received from reverse transfection by KDM5A siRNA # 1-2 or KDM5B siRNA #1-2 for 48h, and cells were trypsinized and reverse transfected by pQC empty vector or pQC-HIV-1 Tat for 48h. (A) KDM5A siRNA KD cells were harvested and lysed for IB of anti-KDM5A, p-IRF3/IRF3, GAPDH, and H3K4me3/H3. (B) KDM5A siRNA KD Cells with or without HIV-1 Tat overexpression were harvested for luciferase reporter assay. (C) KDM5B siRNA KD cells were harvested and lysed for IB of anti-KDM5B, p-IRF3/IRF, GAPDH, and H3K4me3/H3. (D) KDM5B siRNA KD cells with or without HIV-1 Tat overexpression were harvested for luciferase reporter assay. The readouts of RLU/total protein input ( $\mu\text{g}$ ) were normalized with the siNT/pQC-empty vector-transfected TZM-bl control group. Results were calculated from at least 3 independent experiments and presented as mean  $\pm$  standard error of the mean (SEM). (\*\*  $p < 0.01$ ; \*\*\*\*  $p < 0.0001$  by two-way ANOVA and Tukey's multiple comparison test compared to the same treated siNT control).

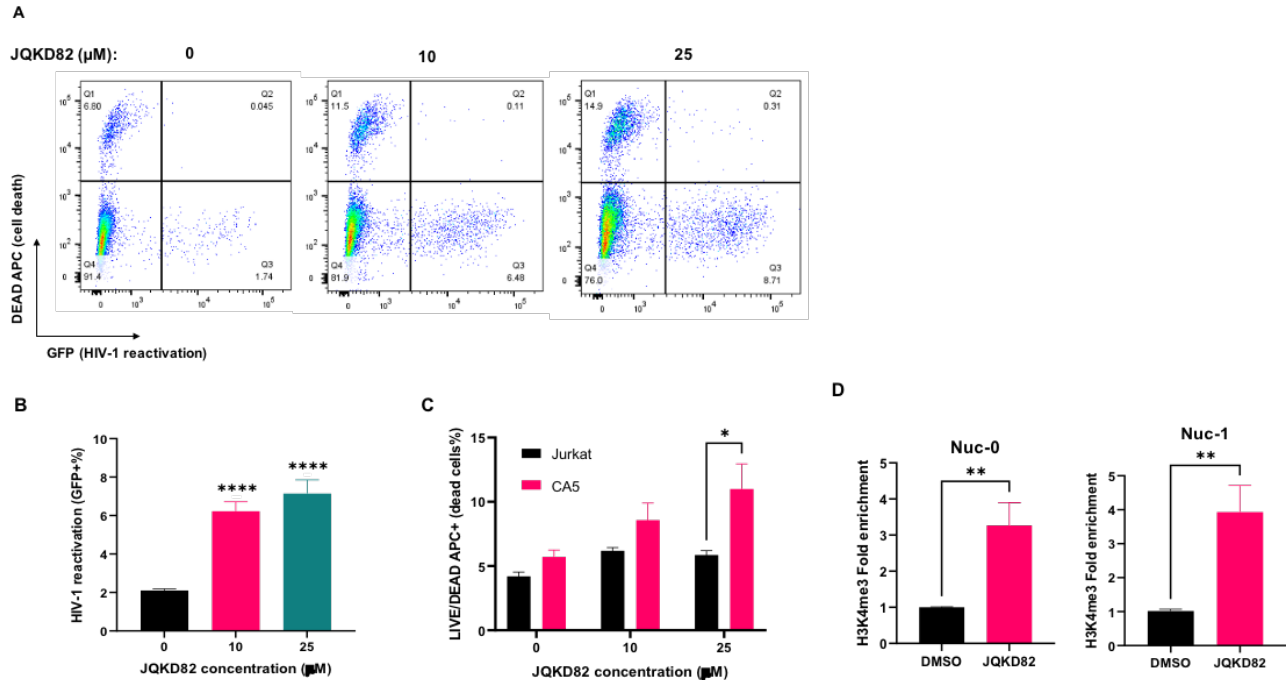

**Fig 2 KDM5 inhibitor JQKD82 induces the HIV-1 reactivation, cell death, and H3K4me3 at HIV-1 LTR in the latent infected CA5 cells.** (A) CA5 cells were treated with 0, 10, or 25  $\mu\text{M}$  JQKD82 for 5 days. Cells were harvested for LIVE/DEAD staining and analyzed with FASC to identify the expression of HIV-1 LTR-driven GFP (B) and LIVE/DEAD-APC (C). CA5 cells were treated with DMSO or 25  $\mu\text{M}$  JQKD82 for 5 days and then harvested to perform the ChIP qPCR assay of H3K4me3 (D) focusing on HIV-1 LTR Nuc-0 and Nuc-1 sites. Results were calculated from at least 3 independent experiments and presented as mean  $\pm$  standard error of the mean (SEM). (\* $p < 0.05$ ; \*\*  $p < 0.01$ ; \*\*\*\*  $p < 0.0001$  by one-way/two-way ANOVA and Tukey's multiple comparison test compared to untreated (B, D) or parental cells control group (C)).

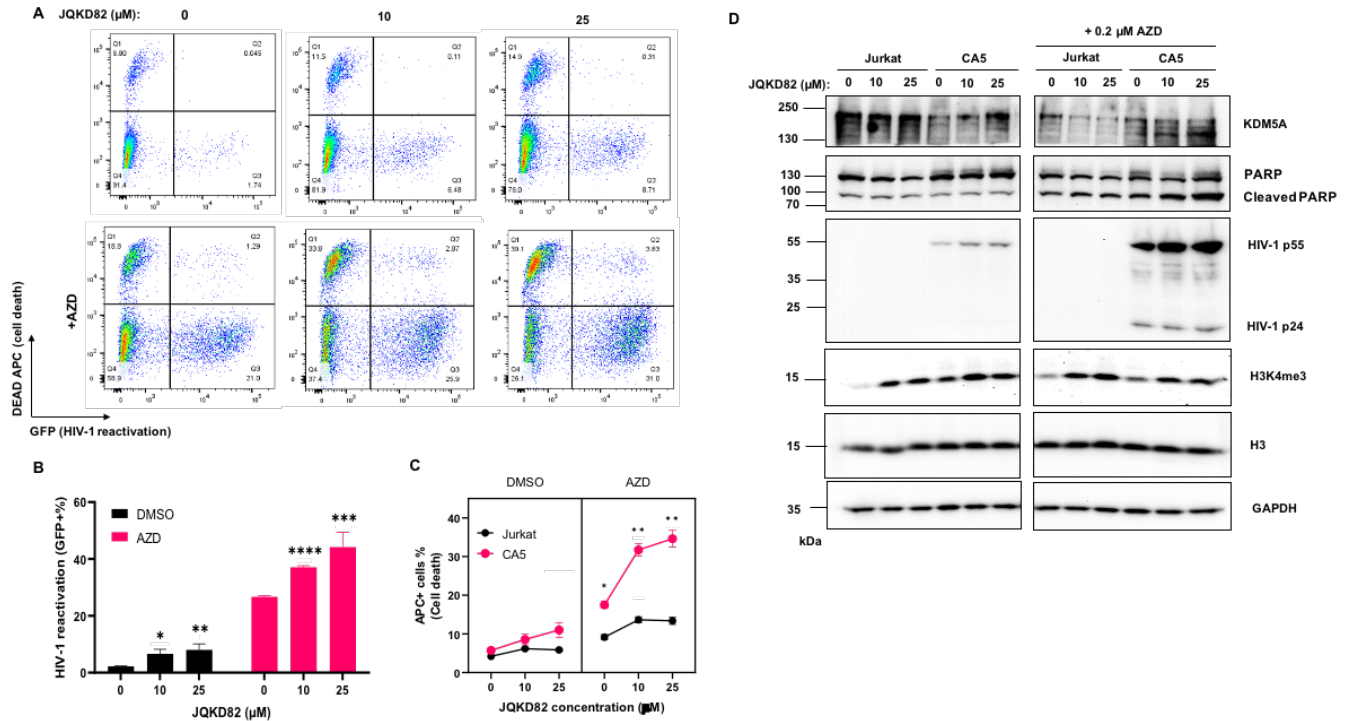

**Fig 3 JQKD82/AZD5582 combination treatment synergistically increases the HIV-1 reactivation and cell death in CA5 cells.** (A) CA5 cells were treated with 0, 10, or 25  $\mu\text{M}$  JQKD82 for 3 days and refreshed the JQKD82-treated medium with or without 0.2  $\mu\text{M}$  AZD5582 for 48h. Cells were performed the LIVE/DEAD staining and analyzed by FACS. (B) Treated CA5 cells were analyzed by the GFP expression from the HIV-1 reactivation. Results were calculated from 3 independent experiments and were presented as mean  $\pm$  standard error of the mean (SEM). (\*p < 0.05; \*\* p < 0.01; \*\*\* p < 0.001; \*\*\*\* p < 0.0001 by 2-way ANOVA and Tukey's multiple comparison test compared to 0  $\mu\text{M}$  JQKD82-treated control). (C) Treated CA5 and parental Jurkat cells were analyzed for the LIVE/DEAD APC expression. Results were calculated from 3 independent experiments and were presented as mean  $\pm$  standard error of the mean (SEM). (\*p < 0.05; \*\* p < 0.01 by 3-way ANOVA and Tukey's multiple comparison test compared to Jurkat cells under the same treatment.). (D) Jurkat and CA5 cells were treated with JQKD82/AZD and harvested for immunoblotting.



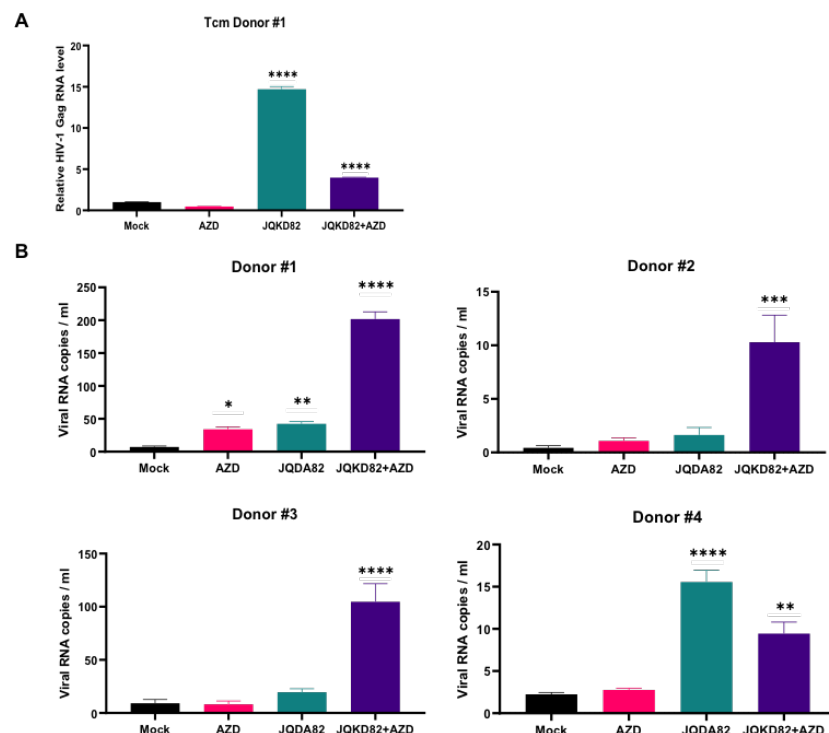

**Fig 4 JQKD82/AZD5582 combinatory treatment induced HIV-1 reactivation in the primary T cells and HIV-1 patients' PBMCs.** (A) The primary Tcm latency model was established by DHIV-1 infection. The DHIV-1 infected Tcm cells were back to latency and treated with DMSO or 10  $\mu$ M JQKD82 for 3 days and then refreshed the treated medium for JQKD82-treated medium for an additional 3 days with or without 0.1  $\mu$ M AZD5582. Cells were harvested for RNA extraction and RT-qPCR analysis for HIV-1 Gag mRNA level. (B) The HIV-1 patients' PBMC with CD8<sup>+</sup> T cell-depletion for Donor #1-4 and treated with DMSO or 10  $\mu$ M JQKD82 for 3 days. Then these cells were refreshed with the JQKD82-treated medium for an additional 3 days with or without 0.1  $\mu$ M AZD5582. Cultured supernatant was harvested for viral RNA extraction and ultrasensitive nested RT-qPCR analysis and normalized the viral RNA copies with HIV-1 III titration standard curve. Results were calculated from 3 technical repeats and presented as mean +/- standard error of the mean (SEM). (\* p<0.05, \*\* p<0.01; \*\*\*\* p<0.0001 by one-way ANOVA and Tukey's multiple comparison test compared higher to mock control group).

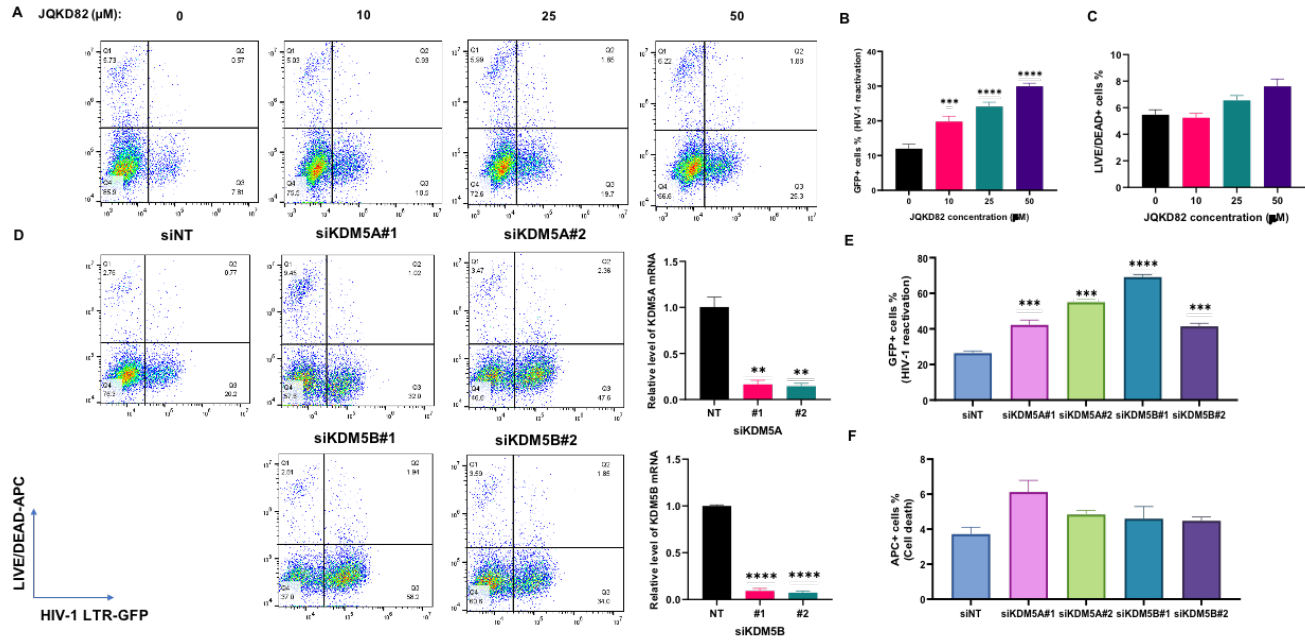

**Fig 5 KDM5 inhibitor JQKD82 or siRNA knockdown of KDM5A/B induced the HIV-1 latency reactivation in HC69 microglia cells.** (A) HC69 microglial cells were treated with 0, 10, 25, or 50 μM JQKD82 for 5 days. Cells were harvested for LIVE/DEAD staining and analyzed with FACS to identify the expression of HIV-1 LTR-driven GFP (B) and LIVE/DEAD-APC (C). HC69 microglia cells were received from reverse transfection by KDM5A siRNA # 1-2, or KDM5B siRNA #1-2 for 72hr. The siRNA-transfected cells were harvested for RNA extraction and RT-qPCR to identify the siRNA KD efficiency. Cells were harvested for LIVE/DEAD staining and analyzed with FACS to identify the expression of HIV-1 LTR-driven GFP (E) and cell death (F). Results were calculated from 3 independent experiments and presented as mean +/- standard error of the mean (SEM). (\*\*\*) p < 0.001; (\*\*\*\*) p < 0.0001 by one-way ANOVA and Tukey's multiple comparison test compared to the untreated or SiNT control group).

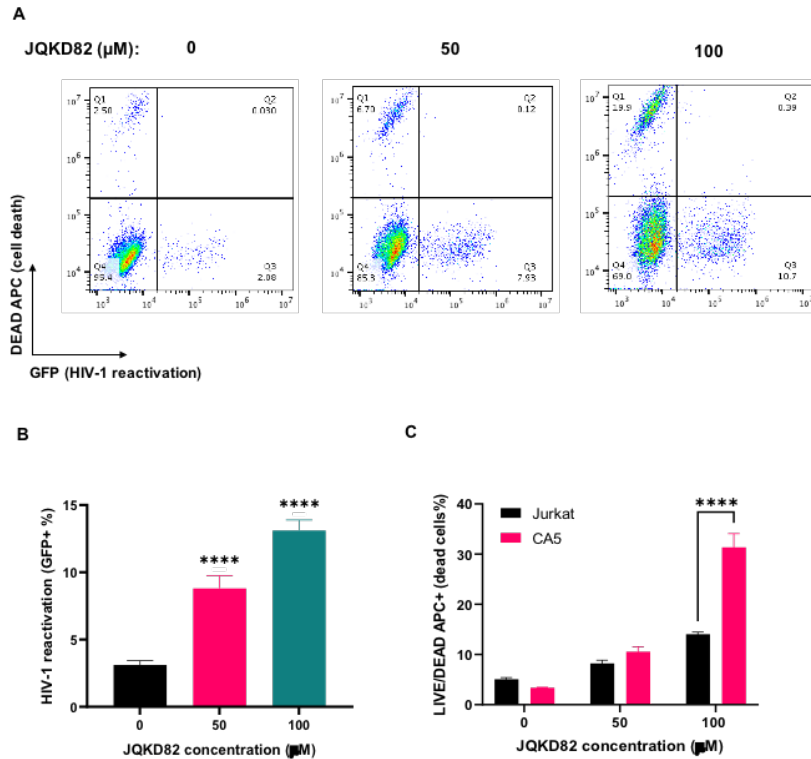

**Fig S1 Short-time treatment of JQKD82 in CA5 cells for HIV-1 reactivation and cell killing.** CA5 cells were treated with 0, 50, or 100  $\mu\text{M}$  JQKD82 for 48 h. Cells were harvested for LIVE/DEAD staining and analyzed with FACS to identify the expression of HIV-1 LTR-driven GFP (**A**, **B**) and LIVE/DEAD-APC (**C**). Results were calculated from at least 3 independent experiments and presented as mean  $\pm$  standard error of the mean (SEM). (\*\*  $p < 0.01$ ; \*\*\*\*  $p < 0.0001$  by one-way/two-way ANOVA and Tukey's multiple comparison test compared to the untreated (**B**) or parental cell control group (**C**)).

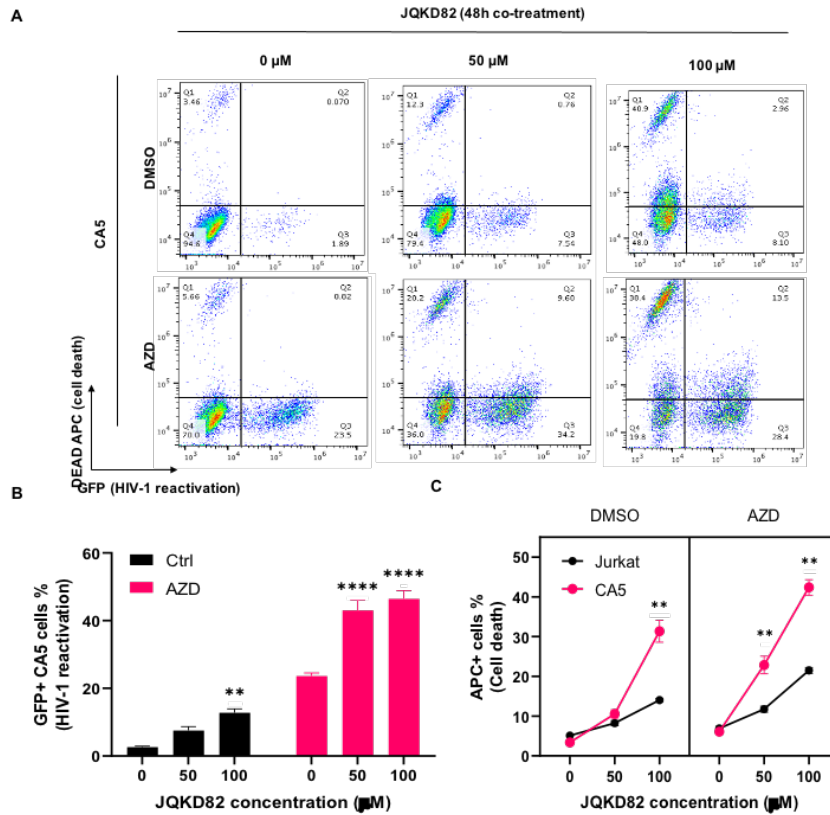

**Fig S2 Short-time treatment of JQKD82/AZD5582 in CA5 cells for HIV-1 reactivation and cell killing.** (A) CA5 cells were treated with 0, 50, or 100  $\mu\text{M}$  with or without 0.2  $\mu\text{M}$  AZD5582 for 48h. Cells were performed the LIVE/DEAD staining and analyzed by FASC. (B) Treated CA5 cells were analyzed by the GFP expression from the HIV-1 reactivation. Results were calculated from 3 independent experiments and were presented as mean  $\pm$  standard error of the mean (SEM). (\*\*  $p < 0.01$ ; \*\*\*\*  $p < 0.0001$  by 2-way ANOVA and Tukey's multiple comparison test compared to 0  $\mu\text{M}$  JQKD82 treated group). (C) Treated CA5 cells were analyzed for the LIVE/DEAD APC expression. Results were calculated from 3 independent experiments and were presented as mean  $\pm$  standard deviation (SEM). (\*\* $p < 0.01$  by 3-way ANOVA and Tukey's multiple comparison test compared to Jurkat cells under the same treatment.).

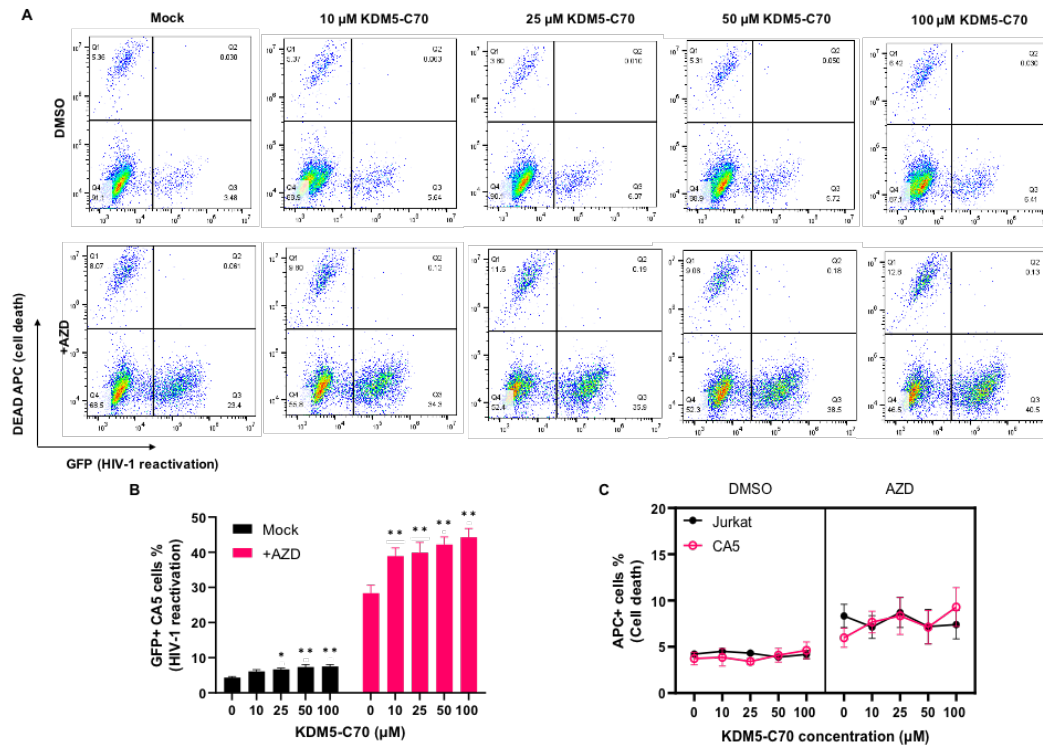

**Fig S3 KDM5 inhibitor KDM5-C70 increased the HIV-1 reactivation in CA5 cells.** (A) CA5 cells were treated with 0, 10, 25, 50, or 100  $\mu$ M KDM5-C70 with or without 0.2  $\mu$ M AZD5582 for 48h. Cells were performed the LIVE/DEAD staining and analyzed by FASC. (B) Treated CA5 cells were analyzed by the GFP expression from the HIV-1 reactivation. Results were calculated from 2 independent experiments and were presented as mean  $\pm$  standard error of the mean. (\*  $p < 0.05$ ; \*\*  $p < 0.01$  by 2-way ANOVA and Tukey's multiple comparison test compared to 0  $\mu$ M KDM5-C70 treated group). (C) Treated CA5 and Jurkat parental cells were analyzed for the LIVE/DEAD APC expression. Results were calculated from 2 independent experiments and were presented as mean  $\pm$  standard error of the mean (SEM).

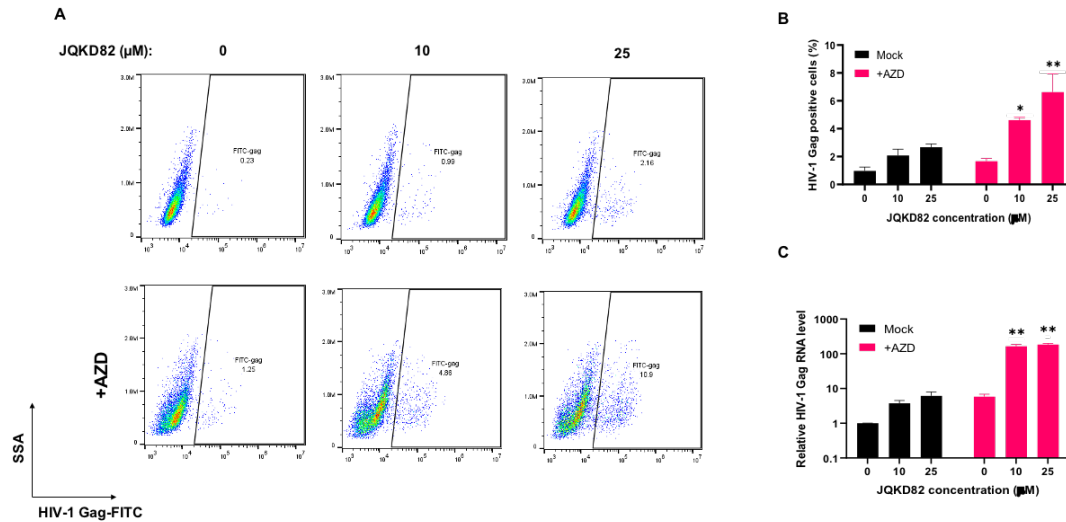

**Fig S4 JQKD82/AZD5582 combinatory treatment increases the HIV-1 reactivation in U1/HIV monocyte cell line.** (A) U1/HIV cells were treated with 0, 10, or 25  $\mu\text{M}$  JQKD82 for 3 days and refreshed the treated medium with or without 0.2  $\mu\text{M}$  AZD5582 for 48h. Cells were performed anti-HIV-1 Gag intracellular staining (B). Treated cells were harvested for RNA extraction and RT-qPCR to detect the HIV-1 Gag mRNA level (C). Results were calculated from at least 2 independent experiments and presented as mean  $\pm$  standard deviation (SD). (\*  $p < 0.05$ ; \*\*  $p < 0.01$ ; by two-way ANOVA and Tukey's multiple comparison test compared to 0  $\mu\text{M}$  JQKD82-treated control.)
